# Supplementary material for: Three-dimensional movements of the pectoral fin during yaw turns in the Pacific spiny dogfish, Squalus suckleyi
Source: PubMed Central journal article supplement (PMC6361209; doi:10.1242/bio.037291), 2018-12-24
Supplement: biolopen-8-037291-s1.pdf [file biolopen-8-037291-s1.pdf]

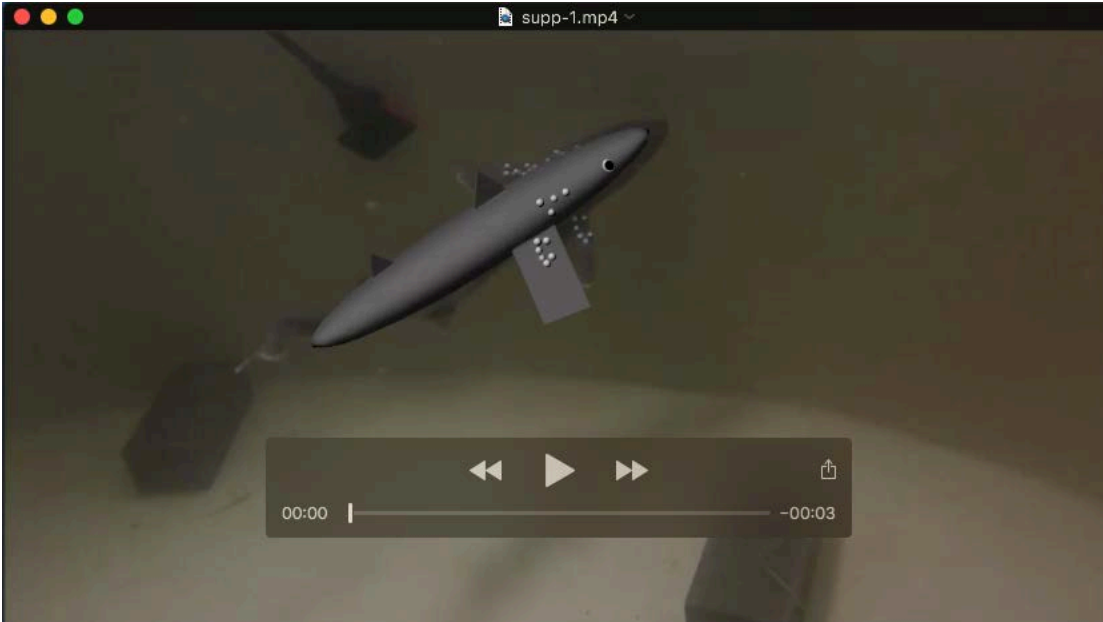

Movie 1: 3D reconstruction of body and fin movement during yaw turning.
